# Supplementary material for: Ginsenosides Rg1 and Rg2 Activate Autophagy and Attenuate Oxidative Stress in Neuroblastoma Cells Overexpressing Aβ(1-42)
Source: MDPI journal article supplement (doi:10.3390/antiox13030310), 2024-03-01
Supplement: s1 [file s1]

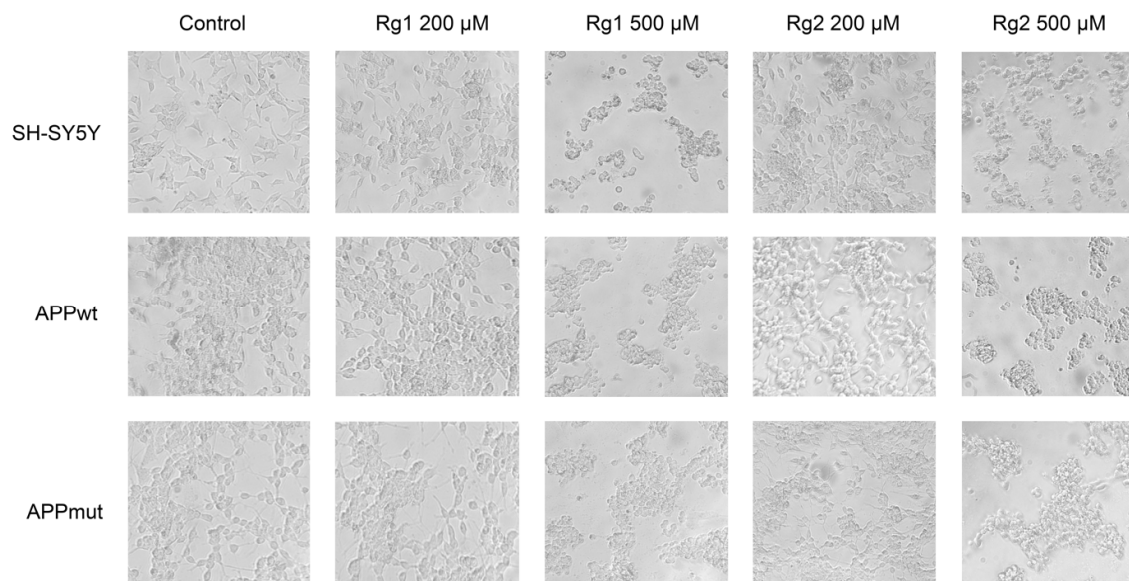

**Figure S1.** Cytotoxicity of ginsenosides in control and untransfected SH-SY5Y cells. Microscopic images of SH-SY5Y cells after a 24 h treatment with Rg1 and Rg2 ginsenosides at 0, 200 and 500  $\mu$ M.
